# Supplementary material
Source: Springer Nature journal article supplement (https://www.springermedizin.de/resource/supplementary/12916_2006_96_MOESM12_ESM.pdf/9599160)
Supplement: MOESM12 [file 9599160]

# Control graph

Illustration J: Principal causes of death, ACT, 1991-96

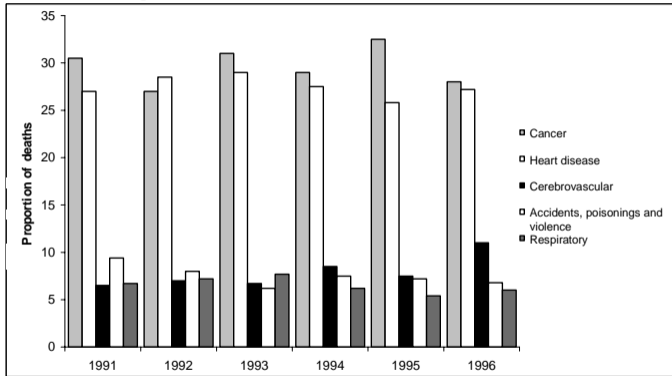

Source: Causes of death Australia 1991-96. ABS Catalogue No. 3303.0

# Intervention graph

Illustration J: Principal causes of death, ACT, 1991-96

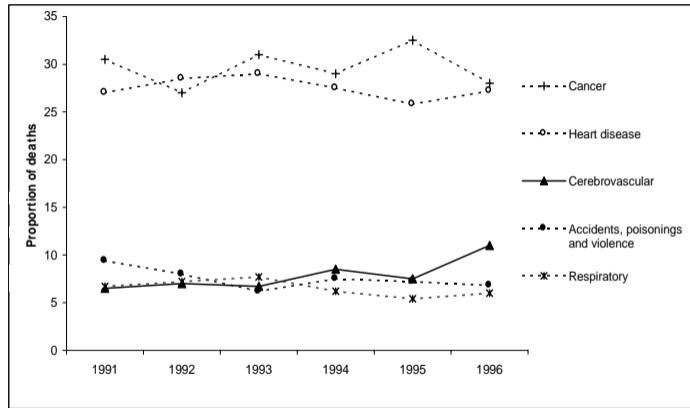

Source: Causes of death Australia 1991-96. ABS Catalogue No. 3303.0
